# Supplementary material
Source: Springer Nature journal article supplement (https://www.springermedizin.de/resource/supplementary/13054_2011_9391_MOESM3_ESM.pdf/9706096)

## A PD-L1 (monocytes. D1-2)

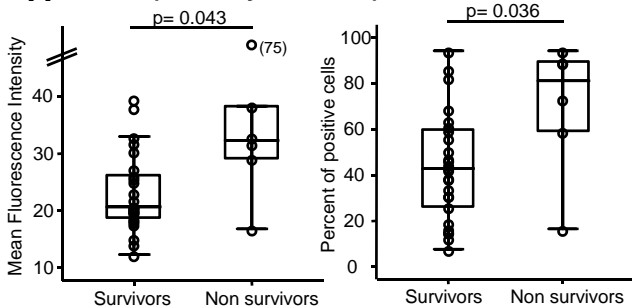

## B PD-1 (monocytes. D3-5)

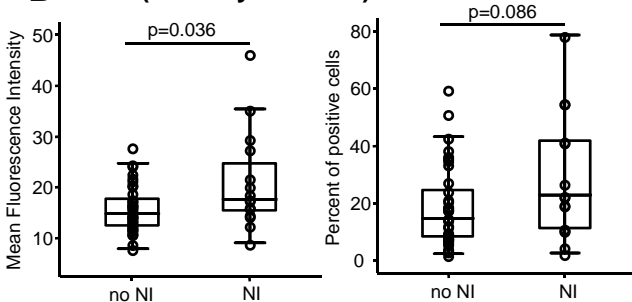

## C PD-L2 (monocytes. D3-5)

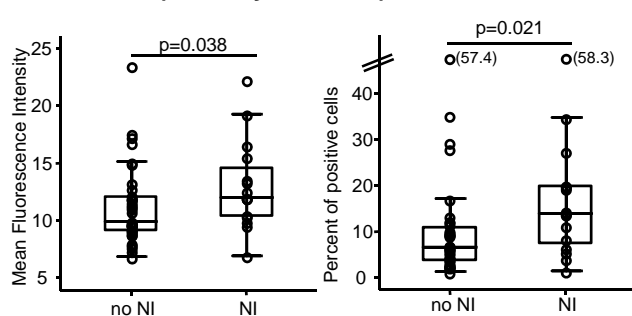

Supplement: MOESM3 [file 9706096]
